# Supplementary material
Source: MDPI journal article supplement (https://www.mdpi.com/2073-445X/12/11/2016)
Supplement: s1 [file s1]

## Article

# Participatory Landscape Conservation: A Case Study of a Seasonally Dry Tropical Forest in Michoacan, Mexico

Neyra Sosa <sup>1,2</sup>, Alejandro Torres <sup>2</sup>, Valerio Castro-Lopez <sup>2</sup> and Alejandro Velazquez <sup>1,3,\*</sup>

<sup>1</sup> Centro de Investigaciones en Geografía Ambiental, Universidad Nacional Autónoma de México, Antigua Carretera a Pátzcuaro 58190, 58190 Morelia, Michoacan, Mexico; neyra.sosa@enesmorelia.unam.mx

<sup>2</sup> Escuela Nacional de Estudios Superiores (ENES), UNAM Campus Morelia, Antigua Carretera a Pátzcuaro 8701, Morelia, Michoacan, Mexico; alejandro\_torres@enesmorelia.unam.mx (A.T.); clvalerio.11@gmail.com (V.C.-L.)

<sup>3</sup> International Office, Freie Universität Berlin, Freie Universität Berlin, Berlin, Germany

\* Correspondence: alex@ciga.unam.mx; Tel.: +52-5521151977 or +49-17672607661

**Table S1.** The table includes each agrarian nucleus's name, municipality, assemblies' dates, and meetings held to discuss core zones and agreements. After reviewing the 64 nuclei, four ultimately chose not to join the Biosphere Reserve by collective decision.

| ID | AGRARIAN COMMUNITY | MUNICIPALITY | DATE OF THE ASSEMBLIES (S)         | CORE ZONE FIRST PROPOSAL | CORE ZONE SECOND PROPOSAL | CONSENSUAL CORE ZONE | MEAN OF AGREEMENT                                     |
|----|--------------------|--------------|------------------------------------|--------------------------|---------------------------|----------------------|-------------------------------------------------------|
| 1  | AGUA NUEVA         | CHURUMUCO    | 05 OF MAY<br>26 OF MAY             | X                        |                           |                      | ASSEMBLY MINUTE<br>ASSEMBLY MINUTE                    |
| 2  | ARRONJADERO        | LA HUACANA   | 15 MARCH<br>04 OF MAY<br>11 OF MAY | X                        |                           |                      | ASSEMBLY MINUTE<br>ASSEMBLY MINUTE<br>ASSEMBLY MINUTE |
| 3  | CAJA DE ZICUIRAN   | LA HUACANA   | 4 OF MARCH                         | X                        |                           |                      | ASSEMBLY MINUTE                                       |

**Citation:** Sosa, N.; Torres, A.; Castro-Lopez, V.; Velazquez, A. Participatory Landscape Conservation: A Case Study of a Seasonally Dry Tropical Forest in Michoacan, Mexico. *Land* **2023**, *12*, 2016. <https://doi.org/10.3390/land12112016>

Academic Editor: Donatella Valente

Received: 3 September 2023

Revised: 17 October 2023

Accepted: 30 October 2023

Published: 4 November 2023

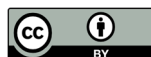

**Copyright:** © 2023 by the authors. Licensee MDPI, Basel, Switzerland. This article is an open access article distributed under the terms and conditions of the Creative Commons Attribution (CC BY) license (<https://creativecommons.org/licenses/by/4.0/>).

| ID | AGRARIAN<br>COMMUNITY                                | MUNICIPALITY | DATE OF<br>THE<br>ASAMBLIES<br>(S)                 | CORE<br>ZONE<br>FIRST<br>PROPOSAL | CORE<br>ZONE<br>SECOND<br>PROPOSAL | CONSENSUAL<br>CORE ZONE | MEAN OF<br>AGREEMENT                                                     |
|----|------------------------------------------------------|--------------|----------------------------------------------------|-----------------------------------|------------------------------------|-------------------------|--------------------------------------------------------------------------|
|    | CAYACO                                               | LA HUACANA   | 11 OF<br>MARCH<br>29 OF APRIL                      | X                                 | X                                  | X                       | ASSEMBLY MINUTE<br>ASSEMBLY MINUTE                                       |
| 4  | CERRO DE LA<br>LUMBRE                                | ARTEAGA      | 14 OF APRIL                                        | X                                 |                                    |                         | ASSEMBLY MINUTE                                                          |
| 5  | CHURUMUCO Y<br>ANX. LAS PILAS<br>Y TIMBIRICHE        | CHURUMUCO    | 6; 14, 16 OF<br>MARCH<br>5 OF APRIL<br>28 OF APRIL |                                   | X                                  |                         | ASSEMBLY MINUTE<br>ASSEMBLY MINUTE<br>ASSEMBLY MINUTE                    |
| 6  | COL. FRANCISCO<br>VILLA                              | LA HUACANA   | 25 OF<br>MARCH<br>1 OF APRIL                       | X                                 |                                    |                         | ASSEMBLY MINUTE<br>ASSEMBLY MINUTE                                       |
| 7  | COLONIA<br>LAZARO<br>CARDENAS                        | LA HUACANA   | 11 OF<br>MARCH                                     | X                                 | X                                  | X                       | ASSEMBLY MINUTE                                                          |
| 8  | CONGURIPO                                            | LA HUACANA   | 19 OF<br>MARCH<br>25 OF<br>MARCH<br>1 OF APRIL     | X                                 | X                                  | X                       | ASSEMBLY MINUTE<br>ASSEMBLY MINUTE<br>ASSEMBLY MINUTE                    |
| 9  | CUIMBO Y ANX.                                        | LA HUACANA   | 1ª. 2 MARCH<br>2ª. 29 APRIL                        | X                                 | X                                  | X                       | ASSEMBLY MINUTE<br>ASSEMBLY MINUTE                                       |
| 10 | CUNUATO                                              | CHURUMUCO    | 15 OF APRIL<br>13 OF MAY<br>2 OF JUNE<br>6 OF JUNE | X                                 |                                    |                         | ASSEMBLY MINUTE<br>ASSEMBLY MINUTE<br>ASSEMBLY MINUTE<br>ASSEMBLY MINUTE |
| 11 | DOTACION<br>CUERAMATO                                | CHURUMUCO    | 31 OF MAY                                          | X                                 |                                    |                         | ASSEMBLY MINUTE                                                          |
| 12 | EL AHUIJOTE                                          | CHURUMUCO    | 27 OF MAY                                          | X                                 |                                    |                         | ASSEMBLY MINUTE                                                          |
| 13 | EL ALGODÓN Y<br>OROPEO Y ANX.                        | LA HUACANA   | 5 OF<br>MARCH                                      | X                                 |                                    | X                       | ASSEMBLY MINUTE                                                          |
| 14 | EL CASCALOTE                                         | ARTEAGA      | 11 OF APRIL<br>15 OF APRIL                         | X                                 |                                    |                         | ASSEMBLY MINUTE<br>ASSEMBLY MINUTE                                       |
| 15 | EL CHAUZ                                             | LA HUACANA   | 11 OF<br>MARCH<br>25 OF<br>MARCH<br>4 OF<br>MARCH  | X                                 |                                    |                         | ASSEMBLY MINUTE<br>ASSEMBLY MINUTE<br>ASSEMBLY MINUTE                    |
| 16 | EL CHILAR                                            | LA HUACANA   | 27 OF APRIL                                        | X                                 |                                    |                         | ASSEMBLY MINUTE                                                          |
| 17 | EL PALMAR Y<br>ANX. (MESA DE<br>VICENTELO<br>PUERTA) | LA HUACANA   | 9 OF<br>MARCH<br>28 OF APRIL                       | X                                 |                                    |                         | ASSEMBLY MINUTE<br>ASSEMBLY MINUTE                                       |
| 18 | EL SAUZ                                              | ARTEAGA      | 14 OF APRIL                                        |                                   |                                    | X                       | ASSEMBLY MINUTE                                                          |
| 19 | EL TERRERO                                           | LA HUACANA   | 14 APRIL                                           | X                                 | X                                  | X                       | ASSEMBLY MINUTE                                                          |

| ID | AGRARIAN COMMUNITY                            | MUNICIPALITY | DATE OF THE ASAMBLIES (S)                 | CORE ZONE FIRST PROPOSAL | CORE ZONE SECOND PROPOSAL | CONSENSUAL CORE ZONE | MEAN OF AGREEMENT                                     |
|----|-----------------------------------------------|--------------|-------------------------------------------|--------------------------|---------------------------|----------------------|-------------------------------------------------------|
| 20 | GENERAL LAZARO CARDENAS (CIRIANCITOS)         | LA HUACANA   | 4 OF MARCH<br>1 OF APRIL<br>7 OF APRIL    | X                        |                           |                      | ASSEMBLY MINUTE<br>ASSEMBLY MINUTE<br>ASSEMBLY MINUTE |
| 21 | GUADALPE OROPEO Y ANX. LAS CRUCECITAS         | LA HUACANA   | 1 OF MARCH<br>4 OF MARCH                  | X                        |                           |                      | ASSEMBLY MINUTE<br>ASSEMBLY MINUTE                    |
| 22 | HUATZIRAN Y ANEXOS (LAS VACAS Y LOS PLACERES) | LA HUACANA   | 18 OF FEB.<br>6 OF MARCH<br>22 OF APRIL   | X                        | X                         | X                    | ASSEMBLY MINUTE<br>ASSEMBLY MINUTE<br>ASSEMBLY MINUTE |
| 23 | ICHAMIO Y ANX. EL TIZATAL                     | LA HUACANA   | 4 OF MARCH                                | X                        | X                         | X                    | ASSEMBLY MINUTE                                       |
| 24 | LA HIGUERITA Y ANX. (EL PASEO)                | CHURUMUCO    | 26 OF MAY                                 |                          |                           |                      | ASSEMBLY MINUTE                                       |
| 25 | LA HUACANA                                    | LA HUACANA   | 22 OF MARCH<br>15 OF APRIL<br>22 OF APRIL | X                        | X                         | X                    | ASSEMBLY MINUTE<br>ASSEMBLY MINUTE<br>ASSEMBLY MINUTE |
| 26 | LA LOMA                                       | CHURUMUCO    | 11 OF APRIL                               |                          |                           |                      | ASSEMBLY MINUTE                                       |
| 27 | LA PAREJA                                     | ARTEAGA      | 11 OF APRIL                               | X                        |                           |                      | ASSEMBLY MINUTE                                       |
| 28 | LA PITIRERA                                   | ARTEAGA      | 14 OF APRIL                               |                          |                           | X                    | ASSEMBLY MINUTE<br>ASSEMBLY MINUTE                    |
| 29 | LA VINATA                                     | ARTEAGA      | 1 OF APRIL                                | X                        | X                         | X                    | ASSEMBLY MINUTE                                       |
| 30 | LAS ANONAS Y ANX.                             | LA HUACANA   | 29 OF APRIL                               | X                        |                           |                      | ASSEMBLY MINUTE                                       |
| 31 | LAS CARAMICUAS                                | TUMBISCATIO  | 27 OF MAY<br>3 OF JUNE<br>9 OF JUNE       | X                        |                           |                      | ASSEMBLY MINUTE<br>ASSEMBLY MINUTE<br>ASSEMBLY MINUTE |
| 32 | LAS CRUCES                                    | TUMBISCATIO  | 27 OF MAY<br>3 OF JUNE<br>9 OF JUNE       |                          | X                         |                      | ASSEMBLY MINUTE<br>ASSEMBLY MINUTE<br>ASSEMBLY MINUTE |
| 33 | LAS ESTANCIAS                                 | LA HUACANA   | 10 OF MARCH<br>20 OF MARCH                | X                        |                           |                      | ASSEMBLY MINUTE<br>ASSEMBLY MINUTE                    |
| 34 | LAS PILAS                                     | CHURUMUCO    | 26 OF MAY                                 |                          | X                         |                      | ASSEMBLY MINUTE                                       |
| 35 | LAS TAMACUAS                                  | LA HUACANA   | 28 OF APRIL<br>4 OF MAY                   |                          | X                         | X                    | ASSEMBLY MINUTE<br>ASSEMBLY MINUTE                    |
| 36 | LIMON DE JORULLO                              | LA HUACANA   | 13 OF APRIL                               | X                        |                           | X                    | ASSEMBLY MINUTE                                       |
| 37 | LLANO DE OJO DEAGUA                           | CHURUMUCO    | 5 OF MAY<br>19 OF MAY                     |                          |                           |                      | ASSEMBLY MINUTE<br>ASSEMBLY MINUTE                    |
| 38 | LOS CHIVOS Y ANX.                             | TUMBISCATIO  | 9 OF JUNE                                 |                          |                           |                      | ASSEMBLY MINUTE                                       |

| ID | AGRARIAN COMMUNITY                                  | MUNICIPALITY | DATE OF THE ASAMBLIES (S) | CORE ZONE FIRST PROPOSAL | CORE ZONE SECOND PROPOSAL | CONSENSUAL CORE ZONE | MEAN OF AGREEMENT |
|----|-----------------------------------------------------|--------------|---------------------------|--------------------------|---------------------------|----------------------|-------------------|
| 39 | LOS COPALES Y ANX.                                  | ARTEAGA      | 28 OF APRIL               |                          |                           | X                    | ASSEMBLY MINUTE   |
| 40 | LOS CUERAMOS DE LA VINATA                           |              | 1 OF APRIL                | X                        |                           | X                    | ASSEMBLY MINUTE   |
| 41 | LOS HORCONES                                        | ARTEAGA      | 1 OF APRIL                | X                        |                           |                      | ASSEMBLY MINUTE   |
| 42 | LOS OLIVOS                                          | LA HUACANA   | 1 OF MARCH                | X                        |                           |                      | ASSEMBLY MINUTE   |
|    |                                                     |              | 6 OF MARCH                |                          |                           |                      | ASSEMBLY MINUTE   |
| 43 | LOS POCITOS                                         | LA HUACANA   | 27 OF MARCH               | X                        | X                         | X                    | ASSEMBLY MINUTE   |
|    |                                                     |              | 1 OF APRIL                |                          |                           |                      | ASSEMBLY MINUTE   |
| 44 | MANGA DE CHAVEZ ANX. (EL PALMARCITO Y LA CRUCITA)   | LA HUACANA   | 29 OF APRIL               |                          |                           |                      | ASSEMBLY MINUTE   |
| 45 | MANGA DE CUIMBIO                                    | LA HUACANA   | 11 OF MARCH               | X                        | X                         | X                    | ASSEMBLY MINUTE   |
|    |                                                     |              | 13 OF APRIL               |                          |                           |                      | ASSEMBLY MINUTE   |
| 46 | MELCHOR OCAMPO                                      | CHURUMUCO    | 6 OF MAY                  | X                        | X                         |                      | ASSEMBLY MINUTE   |
|    |                                                     |              | 20 OF MAY                 |                          |                           |                      | ASSEMBLY MINUTE   |
| 47 | N.C.P. CUERAMATO                                    | CHURUMUCO    | 31 OF MAY                 |                          |                           |                      | ASSEMBLY MINUTE   |
|    |                                                     |              | 24 OF FEB                 |                          |                           |                      | ASSEMBLY MINUTE   |
| 48 | N.C.P. ARTEAGA. LA ESTANCIA O BELLAS FUENTES Y ANX. | LA HUACANA   | 11 OF MARCH.              | X                        | X                         | X                    | ASSEMBLY MINUTE   |
|    |                                                     |              | 28 OF MARCH               |                          |                           |                      | ASSEMBLY MINUTE   |
|    |                                                     |              | 20 OF APRIL               |                          |                           |                      | ASSEMBLY MINUTE   |
| 49 | N.C.P.E. ESFUERZO DEL CAMPESINO                     | LA HUACANA   | 4 OF MARCH                | X                        | X                         | X                    | ASSEMBLY MINUTE   |
|    |                                                     |              | 11 OF MARCH               |                          |                           |                      | ASSEMBLY MINUTE   |
|    |                                                     |              | 6 OF MAY                  |                          |                           |                      | ASSEMBLY MINUTE   |
| 50 | PALMA, PALMA DE GUARO Y ANX. (LA CALERA, COPALITOS) | CHURUMUCO    | 6 OF MAY                  | X                        |                           |                      | ASSEMBLY MINUTE   |
|    |                                                     |              | 12 OF MAY                 |                          |                           |                      | ASSEMBLY MINUTE   |
| 51 | PIEDRAS NEGRAS                                      | LA HUACANA   | 4 OF MARCH                |                          |                           |                      | ASSEMBLY MINUTE   |
|    |                                                     |              | 06 OF MAY                 |                          |                           |                      | ASSEMBLY MINUTE   |
| 52 | PINZANDARAN                                         | ARTEAGA      | 1 OF APRIL                |                          | X                         | X                    | ASSEMBLY MINUTE   |
| 53 | PUEBLO VIEJO                                        | LA HUACANA   | 14 OF APRIL               | X                        | X                         | X                    | ASSEMBLY MINUTE   |
| 54 |                                                     | LA HUACANA   | 24 OF FEB                 | X                        |                           | X                    | ASSEMBLY MINUTE   |

| ID | AGRARIAN<br>COMMUNITY                                            | MUNICIPALITY | DATE OF<br>THE<br>ASAMBLIES<br>(S) | CORE<br>ZONE<br>FIRST<br>PROPOSAL | CORE<br>ZONE<br>SECOND<br>PROPOSAL | CONSENSUAL<br>CORE ZONE | MEAN OF<br>AGREEMENT |
|----|------------------------------------------------------------------|--------------|------------------------------------|-----------------------------------|------------------------------------|-------------------------|----------------------|
|    | SAN FRANCISCO<br>DE LOS<br>RANCHOS                               |              | 24 OF<br>MARCH                     |                                   |                                    |                         | ASSEMBLY MINUTE      |
| 55 | SAN ISIDRO Y<br>LOS ADOBES                                       | LA HUACANA   | 18 OF FEB                          | X                                 |                                    |                         | ASSEMBLY MINUTE      |
| 56 | SAN JOSE DEL<br>MILAGRO                                          | ARTEAGA      | 12 OF APRIL                        | X                                 |                                    | X                       | ASSEMBLY MINUTE      |
|    |                                                                  |              | 1 OF<br>FEBRERO                    |                                   |                                    |                         | ASSEMBLY MINUTE      |
| 57 | SIN AGUA                                                         | LA HUACANA   | 28 OF<br>FEBRERO                   | X                                 |                                    |                         | ASSEMBLY MINUTE      |
|    |                                                                  |              | 19 OF<br>MARCH                     |                                   |                                    |                         | ASSEMBLY MINUTE      |
|    |                                                                  |              | 14 OF APRIL                        |                                   |                                    |                         | ASSEMBLY MINUTE      |
| 58 | TOLUQUILLA                                                       | ARTEAGA      | 28 OF APRIL                        |                                   | X                                  | X                       | ASSEMBLY MINUTE      |
|    |                                                                  |              | 1 OF JUNE                          |                                   |                                    |                         | ASSEMBLY MINUTE      |
| 59 | VILLA HERMOSA                                                    | LA HUACANA   | 28 OF APRIL                        | X                                 |                                    |                         | ASSEMBLY MINUTE      |
|    |                                                                  |              | 4 OF<br>MARCH                      |                                   |                                    |                         | ASSEMBLY MINUTE      |
| 60 | ZICUIRAN                                                         | LA HUACANA   | 10 OF<br>MARCH                     | X                                 | X                                  | X                       | ASSEMBLY MINUTE      |
| 61 | EL CAPIRE DE<br>OROPEO                                           | LA HUACANA   | 29 OF APRIL                        | X                                 |                                    |                         | NONE                 |
| 62 | GRACIANO<br>SANCHEZ                                              | TUMBISCATIO  | 8 OF JUNE                          |                                   |                                    |                         | NONE                 |
| 63 | LOS COPALES                                                      | ARTEAGA      | 28 OF APRIL                        |                                   | X                                  |                         | NONE                 |
| 64 | LOS LIMONES Y<br>LOS ANEXOS (EL<br>CHUPADERO Y<br>LOS BARRILLOS) | LA HUACANA   | 17 OF<br>MARCH<br>9 OF JUNE        | X                                 |                                    |                         | NONE                 |
